# Supplementary material for: Research : Continuous Surveillance of Sleep Apnea Patients in a Medical-Surgical Unit
Source: Atypon-hosted journal article supplement (doi:10.2345/0899-8205-51.3.236), 2017-05-01
Supplement: supe+et+al_datasuppl_final.pdf [file supe+et+al_datasuppl_final.pdf]

Link Demo Slot X500 Pragmatic Play Gratis & Akun Slot Demo PG Soft Gacor Anti Rungkad


  


DAFTAR
LOGIN

LIVECHAT
WHATSAPP

DAFTAR
LOGIN

LIVECHAT
WHATSAPP


|  |  |
| --- | --- |
| **20 LINK SLOT GRATIS** | **PRAGMATIC PLAY & PG SOFT** |
| **DEMO SLOT** | **DEMO SLOT PRAGMATIC, DEMO SLOT X500, DEMO SLOT PG, Demo Slot X500, DEMO SLOT ANTI RUNGKAD** |
| **SLOT DEMO** | **SLOT DEMO PRAGMATIC, SLOT DEMO X500, SLOT DEMO PG, SLOT DEMO GRATIS, SLOT DEMO TANPA DEPOSIT** |
| **AKUN SLOT** | **AKUN DEMO SLOT PRAGMATIC, AKUN DEMO SLOT PG, AKUN Demo Slot X500, AKUN Demo Slot X500** |
| **SLOT PRAGMATIC TERBARU** | **GATE OF OLYMPUS X1000, STARLIGHT PRINCESS X1000** |
| **MINIMAL DEPOSIT DAN WITHDRAW** | **RP 10.000,-** |
| **PERANGKAT BERMAIN** | **KOMPUTER, LAPTOP, TAB & SMARTPHONE (IOS, ANDROID, & WINDOWS)** |
| **RATING LINK SLOT PRAGMATIC PLAY** | **⭐⭐⭐⭐⭐ 98%** |

### 20 Akun Demo Slot Pragmatic Play & PG Soft Gacor Pasti Maxwin X500

Demo Slot Gates Of GatotKaca

Gates Of Olympus

Starlight Princess

Sugar Rush

Aztec Gems

Sweet Bonanza

Mochimon

Wisdom Of Athena

Bonanza Gold

Big Bass Bonanza

Pyramid Bonanza

Wild West Gold

  
  


# Link Demo Slot X500 Pragmatic Play Gratis & Akun Slot Demo PG Soft Gacor Anti Rungkad

Demo slot x500 atau slot demo x500 merupakan fitur yang dihadirkan oleh provider pragmatic play untuk membantu para pemain demo slot anti rungkad. Dimana dengan hadirnya demo slot online sudah sangat dicari oleh seluruh kalangan petaruh slot pragmatic play. Karena slot demo pragmatic play dimainkan dengan tanpa uang sepersenpun atau bisa dikatakan gratis. hal ini dilakukan untuk mengasah kemampuan pemain slot demo gacor dan menemukan pola permainan didalam slot demo gacor. Tentu dengan adanya akun demo slot ini membuat para pemain link demo slot tidak akan takut saat bermain slot online gacor.

  

Dengan bermain demo slot x500 para pemain demo slot gacor pasti akan mendapatkan keuntungan dengan mendapatkan kemenangan jacpot yang besar. Serta pemain slot demo online akan merasakan keseruan mendapatkan maxwin dengan mudah tanpa mengeluarkan uang asli. Selain itu seluruh pemain link demo slot akan mendapatkan layanan 24 jam setiap hari tanpa batasan dan bisa bermain dengan santai. Kelebihan yang diberikan demo slot pragmatic play ini harus slotmania gunakan secara maksimal untuk mengetahui seluruh fitur didalam permainan pragmatic play agar mudah mendapatkan maxwin setiap hari.

## Manfaat Mengunakan Fitur Akun Slot Demo PG Soft Anti Rungkad

Di dalam suatu fitur yang dihadirkan seluruh provider slot demo online salah satunya pg soft yang memiliki manfaat dan kelebihan yang berbeda dengan provider slot demo slot lainnya. fitur yang disediakan tentu membuat seluruh pemain mendapatkan kenyamanan dan aman dalam memainkan slot demo pg soft. Dengan menggunakan akun slot demo pg soft anti rungkad tentu seluruh pemain akan mendapatkan manfaat yang menguntungkan seperti:

  

### 1. Menemukan Jenis Permainan Demo Slot PG Soft Yang Sedang Gacor

Dalam bermain demo slot pg soft kita dapat mencoba seluruh permainan yang dihadirkan oleh provider pg soft secara gratis. sehingga para pemain demo pg soft dapat mengetahui permainan slot yang sedang gacor hari ini dan mendapatkan keuntungan yang berlimpah.

  

### 2. Bebas Dari Resiko Kerugian Besar

Manfaat yang paling terlihat adalah bebasnya dari resiko besar yang disediakan fitur demo slot anti rungkad. Pemain akun slot demo pg soft dapat menikmati keseruan slot online gacor tanpa takut kehilangan uang asli. Hal ini dapat dilakukan oleh para seluruh petaruh slot online untuk mencoba berbagai permainan dan mempelajari pola serta fitur unggulan yang dihadirkan provider pg soft.

  

### 3. Dapat Menemukan Game PG Soft Yang Mudah Cuan

>Dengan ratusan permainan slot gacor yang dihadirkan oleh provider pg soft. Pasti menemukan game yang mudah cuan sangat sulit. Slot demo pg soft memberikan kepada pemain slot demo gacor untuk memasuki game dan dapat memilih game yang paling mereka sukai berdasarkan tampilan, grafik yang menarik tanpa mengeluarkan uang sepersenpun.

  

### 4. Bisa Menentukan Strategi Permainan

Slot demo online memungkinkan seluruh pemain slot pg soft dalam mendapatkan strategi permainan. Meskipun slot online dicap sebagai permainan keberuntungan. Tetapi pemain slot online dapat mencoba berbagai strategi secara gratis dan memberikan kebebasan dalam melakukan eksperimen dengan taruhan yang maksimal.

  

### 5. Mengakses Demo Slot PG Soft Tanpa Adanya Batasan

Demo slot anti rungkad sangat berbeda dengan permainan casino yang memiliki batasan waktu. Demo slot pg soft dapat diakses kapan saja dan dimana saja tanpa adanya batasan selama jaringan internet slotmania tidak terputus. Dengan ini membuat para petaruh slot demo gacor dapat dengan nyaman berlatih sesuai waktu luang pemain.

  

## 10 Permainan Slot Demo Pragmatic Play Yang Sedang Gacor Atau On Fire

Para pemain slot online yang ingin bermain demo slot pragmatic play, pasti akan merasakan kekesalan saat mengalami kekalahan dalam memainkan slot demo pragmatic play. Tapi untuk saat ini kami memiliki saran untuk mengurangi kekalahan yang dialami oleh pemain slot demo x500. Namun saat ini sangat sedikit pemain slot gacor yang mengetahui adanya fitur demo slot anti rungkad. Harus kalian ketahui bahwa salah satu provider terbaik dalam menghadirkan demo slot x500 adalah slot demo pragmatic play anti rungkad. Tidak semua pemain slot online gacor mengetahui game pragmatic play yang sedang gacor. dengan ini kami memiliki pilihan 10 permainan slot demo pragmatic play anti rungkad.

### **1. Slot Demo Online Gates Of Olympus**

Gates Of Olympus

Permainan gates of olympus sudah menjadi game sangat populer dari permainan lainnya yang dihadirkan demo slot pragmatic play karena didalam game ini memiliki fitur demo slot x500 yang sangat menguntungkan bagi pemain slot online pragmatic play saat ini.

  

### **2. Slot Demo Online Gates Of Gatotkaca**

Gates Of Gatotkaca

Game gates of olympus memiliki tampilan seorang pahlawan gatot kaca yang sangat dikenal di Indonesia yang sering membantu masyarakat yang mengalami kesulitan. Sehingga pragmati play menghadirkan gatotkaca ke dalam permainan demo slot anti rungkad karena mudah menang.

  

### **3. Slot Demo Online Starlight Princess**

Starlight Princess

Permainan gacor yang dihadirkan slot demo pragmatic play ini memiliki kepopularitasan yang sangat tinggi oleh pemain slot demo x500. Starlight princess memiliki fitur gacor free spin tanpa harus mengeluarkan uang selain itu game demo slot online ini memiliki perkalian demo slot x500 hinga bisa lebih besar lagi.

  

### **4. Slot Demo Online Wisdom Of Athena**

Gates Of Olympus

Permainan gates of olympus sudah menjadi game sangat populer dari permainan lainnya yang dihadirkan demo slot pragmatic play karena didalam game ini memiliki fitur demo slot x500 yang sangat menguntungkan bagi pemain slot online pragmatic play saat ini.

  

### **5. Slot Demo Online Sweet Bonanza**

Sweet Bonanza

Game slot online pragmatic play ini memiliki tampilan buah buahan segar yang berwarna warni dan menarik mata untuk dimainkan. para pemain slot demo gacor dapat dengan mudah mendapatkan hadiah maxwin didalam permainan slot demo anti rungkad satu ini karena memiliki perkalian slot demo x500 yang sangat mudah mendapatkan maxwin.

  

### **6. Slot Demo Online Wild West Gold**

Wild West Gold

Jenis permainan satu ini sangat menarik untuk dimainkan. para petaruh slot demo online dapat merasakan keseruan dengan tampilan tembak menembak dari koboy serta suara yang menarik. Selain dari tema koboi yang seru, permainan wild west gold memiliki perkalian odds demo slot x500 hingga x5000 yang sangat mudah didapatkan.

  

### **7. Slot Demo Online Sugar Rush**

Sugar Rush

Salah satu game slot gacor yang dikembangkan oleh pragmatic play memiliki tampilan permen manis dan warna yang menarik untuk dimainkan. demo slot sugar rush dapat dimainkan didalam demo pragmatic play secara gratis tanpa syarat sama sekali serta pemain demo slot gacor dapat menghilangkan rasa bosan dalam bermain game slot online.

  

### **8. Slot Demo Online Aztec Gems**

Aztec Gems

Aztec gems memiliki grafik pahlawan dari dewa olympus yang memiliki gambar permata dan harta karun jaman dahulu yang sangat banyak. Sehingga game satu ini menjadi tempat mencari harta karun oleh peman demo slot anti rungkad hari ini.

  

### **9. Slot Demo Online Sweet Bonanza Gold**

Sweet Bonanza Gold

Sweet bonanza Gold termasuk kumpulan game pragmatic play yang sedang gacor karena game demo gratis ini memiliki keunikan tersendiri dengan arti keuntungan manis. Dan para pemain demo slot pragmatic bisa mendapatkan keuntungan setiap memutar gulungan didalam permainan ini.

  

### **10. Slot Demo Online Mahjong Ways 2**

Gates Of Olympus

Permainan demo gacor mahjong ways 2 menjadi permainan slot demo anti rungkad tanpa menggunakan uang asli. Kami memilih permainan ini karena mudah untuk dimainkan dan mudah dalam mendapatkan cuan dengan mudah sehingga para pemain bisa dapat dengan mudah untuk memenangan hadiah maxwin besar melalui game demo slot ini.

  

## Rasakan Fitur Layanan Terbaik Dari Provider Demo Slot Pragmatic Play

Ketika saat memainkan demo slot pragmatic telah menarik perhatian semua orang dengan fitur layanan terbaik dari provider slot demo pragmatic play. Dengan ini slot demo pragmatic sangat dicari ileh para peemain demo slot gacor setiap hari. Dengan keseruan layanan dari slot demo pragmatic maka semua pemain slot pragmatic play sangat berbondong-bondong ingin merasakan fitur layanan terbaik demo pragmatic. Maka sudah tidak diherankan jika demo slot pragmatic play menjadi satu satunya solusi dalam mendapatkan demo slot x500 mudah maxwin. Dan inilah menjadi alasan para pemain demo gacor ingin mencoba bermain slot online hair ini. rasakan keseruan fitur layanan terbaik dari demo slot pragmatic plat yang sangat mudah cuan kepada pemain demo slot online.

  

Selain ini demo slot pragmatic memiliki fitur demo slot x500 yang sangat diminati oleh para pemain akun demo slot pragmatic play. Sehingga para slotmania ingin memainkan demo pragmatic gratis yang sangat mudah menang maxwin. Dengan gampang maxwin dari game slot demo pragmatic memberi keseruan tersendiri dalam permainan demo slot anti rungkad. Tidak hanya itu demo slot gacor sering memberikan kesenenagan dan keseruan kepada pengguna slot demo slot. Jadi nikmati fitur demo slot mudah maxwin yang menggunakan akun demo slot terbaik di Indonesia.

  

## Wajib Ketahui Kata Istilah Yang Dapat Ditemukan Didalam Demo Slot PG Soft & Slot Demo Pragmatic Play

RTP ( return to player ) merupakan pengembalian modal bermain kepada pemain demo slot gacor. rtp memiliki gambaran persentase rata rata dari total taruhan pemain yang akan dikembalikan dalam jangka waktu tertentu.

  

Jackpot adalah dimana kondisi pemain slot online mendapatkan kemenangan yang besar. Jika pemain demo slot pg soft dan slot demo pragmatic play mendapatkan hadiah besar berarti bisa dikatakan jackpot.

  

Maxwin memiliki arti yaitu kemenangan maksimal. Dimana permain slot online gacor mendapatkan kemenangan hadiah paling maksimal dan bisa dikatakan hadiah maxwin diatas dari jackpot.

  

Rungkad merupakan kata istilah yang dibuat oleh pemain slot gacor online diindonesia. Jika petaruh slot gacor bermain dan mengalami kekalahan secara terus menerus maka bisa dikatakan rungkad.

  

Gacor memiliki kepanjangan yaitu gampang bocor. Dimana game yang dimainkan selalu memberikan kemenangan secara terus menerus dan jika mendapatkan kemenangan secara tersmi menerus di game slot online gacor maka slotmania mendapatkan game yang sedang gacor.

  

## Mitratogel Penyedia Akun Slot Demo Pragmatic Play & PG Soft Tanpa Deposit

Pada sekarang ini mencari sebuah website yang menyediakan akun slot demo pragmatic play, akun slot pg soft tanpa deposit sangatlah sulit sekali. Walaupun sekarang ini digoogle pencaharian banyak situs yang mengatasnamakan sebagai situs penyedia akun demo slot tanpa deposit, akan tetapi setelah masuk kedalam link slot tersebut para pemain diharuskan untuk melakukan deposit terlebih dahulu untuk bisa bermain slot pragmatic, slot pg soft. Maka dari itu kami website mitratogel memberikan halaman situs ini yang bertujuan untuk para pemain bisa mendapatkan tempat mendapatkan akun slot demo tanpa deposit saat ingin mencoba bermain game slot terbaru melalui demo pg soft, demo pragmatic play.

  

Mitratogel slot selalu mengutamakan apa yang diinginkan oleh setiap pemain game slot online, dengan memberikan pelayanan akun demo slot gratis dimana pemain tidak perlu harus melakukan deposit untuk bisa mendapatkan akun slot demo pragmatic, dan akun slot demo pg soft saat ingin bermain demo pg, serta demo pragmatic. Untuk cara daftar akun demo slot anti rungkad disini juga sangatlah mudah sekali, anda semua hanya tinggal klik tombol daftar untuk daftar akun demo slot, dan tombol login untuk bisa langsung bermain demo slot online yang telah kami sediakan dari bermain provaider link slot gacor. Jadi tunggu apalagi langsung saja kunjungi link mitratogel untuk mendapatkan akun demo slot online tanpa deposit sekarang juga.

  

## FAQ - Pertanyaan Yang Sangat Sering Di Ajukan Oleh Banyak Pemain Slot Pragmatic Play & PG Soft

FAQ adalah sebuah singkatan dari frequently asked questions yang banyak sekalian artian pertanyaan yang sering ditanyakan oleh pemain slot sebelum bermain demo slot online.

  

1. Apa Itu Demo Slot?

Demo slot adalah sebuah fitur gratisan yang disediakn oleh provaider game slot online seperti pragmatic play dan pg soft. tujuan dari adanya demo slot untuk memberikan kemudahan bagi setiap player slot dalam mengetahui cara bermain serta pola gacor game slot online sebelum terjun bermain menggunakan uang asli, tujuan lain dari tersediannya slot demo ini juga untuk memberikan pemainan slot gacor tanpa harus memikitkan deposit dan credit game saat bermain.

2. Apakah Slot Demo Berbayar?

Untuk bermain slot demo para pemain tidak perlu harus mengeluarkan biaya sepersen pun alis tidak berbayar. Yang berbayar hanya game slot online jadi jangan sampai salah dalam memahaminya ya, dalam halaman situs kami ini telah menyediakan slot demo gratis anti rungkad bagi setiap orang yang ingin bermain game slot gratis.

3. Kenapa Akun Demo Slot Gratis Banyak Di Cari?

Akun demo slot gratis banyak dicari karena dalam setiap pendaftarannya tidak perlu harus mengeluarkan biaya sedikit pun, serta dalam setiap game slot online juga dapat dimainkan sepuasnya tanpa memikirkan biaya deposit

  

Copyright Mitratogel Sbobet | Slot Demo. All Right Reserved

  
  

LOGIN

DAFTAR
